# Supplementary material
Source: MDPI journal article supplement (https://www.mdpi.com/1999-4907/14/3/656)
Supplement: s1 [file s1]

**Table S1.** Soil Se and Cd contents of different parent materials and land use types in the study area.

| Type             |             | Se (mg/kg) | Cd (mg/kg) |
|------------------|-------------|------------|------------|
| Parent material* | qrc         | 0.43±0.13  | 0.31±0.11  |
|                  | rls         | 0.40±0.13  | 0.38±0.13  |
|                  | wacr        | 0.31±0.12  | 0.29±0.05  |
|                  | war         | 0.53±0.19  | 0.31±0.12  |
|                  | wcr         | 0.50±0.13  | 0.34±0.15  |
|                  | wq          | 0.77±0.29  | 0.37±0.17  |
|                  | wrs         | 0.49±0.07  | 0.27±0.15  |
| Land use         | dryland     | 0.55±0.25  | 0.31±0.12  |
|                  | orchard     | 0.51±0.16  | 0.22±0.13  |
|                  | paddy field | 0.49±0.18  | 0.36±0.10  |
|                  | forestland  | 0.48±0.14  | 0.31±0.19  |

\*Parent materials and land use types in the study area. Parent materials: qrc-quaternary red clays, rls-river and lake sediments, wacr-weathered acidic crystalline rocks, war-weathered argillaceous rocks, wcr-weathered carbonate rock, wq-weathered quartzite, wrs-weathered red sandstones.
